# Supplementary material for: “It’s still a great adventure” – exploring offshore employees’ working conditions in a qualitative study
Source: Springer Nature journal article supplement (doi:10.1186/s12995-017-0179-0), 2017-12-01
Supplement: MOESM1 [file 15290690]

## Additional file 1: Main and sub-categories for working conditions

|                          | <b>Job demands</b>                                                                                                                                                                                         | <b>Job resources</b>                                                                                                                                                        |
|--------------------------|------------------------------------------------------------------------------------------------------------------------------------------------------------------------------------------------------------|-----------------------------------------------------------------------------------------------------------------------------------------------------------------------------|
| <b>Work tasks</b>        | physical work<br>transfer and access to installations<br>accident risks<br>workloads<br>demanding work tasks<br>work equipment                                                                             | meaning of work<br>perception of safety<br>motivation and satisfaction<br>challenging work tasks<br>skills and competencies<br>versatility of work<br>scope of action       |
| <b>Work organization</b> | work time<br>time pressure<br>waiting times, weather days<br>workflow<br>cost pressure<br>work schedule<br>personnel<br>communication on-/offshore<br><i>experts only</i> : emergency medical care<br>care | work time<br>payment<br>waiting times, weather days<br>workflow<br>work schedule<br><i>experts only</i> : emergency medical care<br><i>experts only</i> : medical check-ups |
| <b>Work environment</b>  | weather conditions<br>workplace design<br>physicochemical factors                                                                                                                                          | weather conditions                                                                                                                                                          |
| <b>Social relations</b>  | conflicts with colleagues<br>international work environment                                                                                                                                                | social support<br>international work environment                                                                                                                            |
| <b>New forms of work</b> | absence from home<br>catering<br>accommodation<br>opportunities for leisure activities and retreat<br>means of communication                                                                               | free time at home<br>catering<br>accommodation<br>opportunities for leisure activities and retreat                                                                          |
